# Supplementary material for: HTLV-1 Tax Oncoprotein Subverts the Cellular DNA Damage Response via Binding to DNA-dependent Protein Kinase
Source: PubMed Central journal article supplement — J Biol Chem. 2008 Dec 26;283(52):36311–20. doi: 10.1074/jbc.M804931200 (PMC2605996; doi:10.1074/jbc.m804931200), 2008-12-26

Supplemental Figure 1. **Nuclear excluded Tax mutant fails to enhance IRIF formation.** Cells were transfected with expression vectors for Tax (B, J, R) or Tax mutant (F, N, V) and subjected to 5 Gy ionizing radiation. The cells were then allowed to recover for 1 hour (A to H), 4 hours (I to P) and 8 hours (Q to X). Also shown is expression of gH2AX (C, G, K, O, S, W). Nuclei were counterstained with DAPI/TOPRO-3-iodide (A, E, I, M, Q, U) and merged images are shown (D, H, L, P, T, X).

Sup. Fig. 1

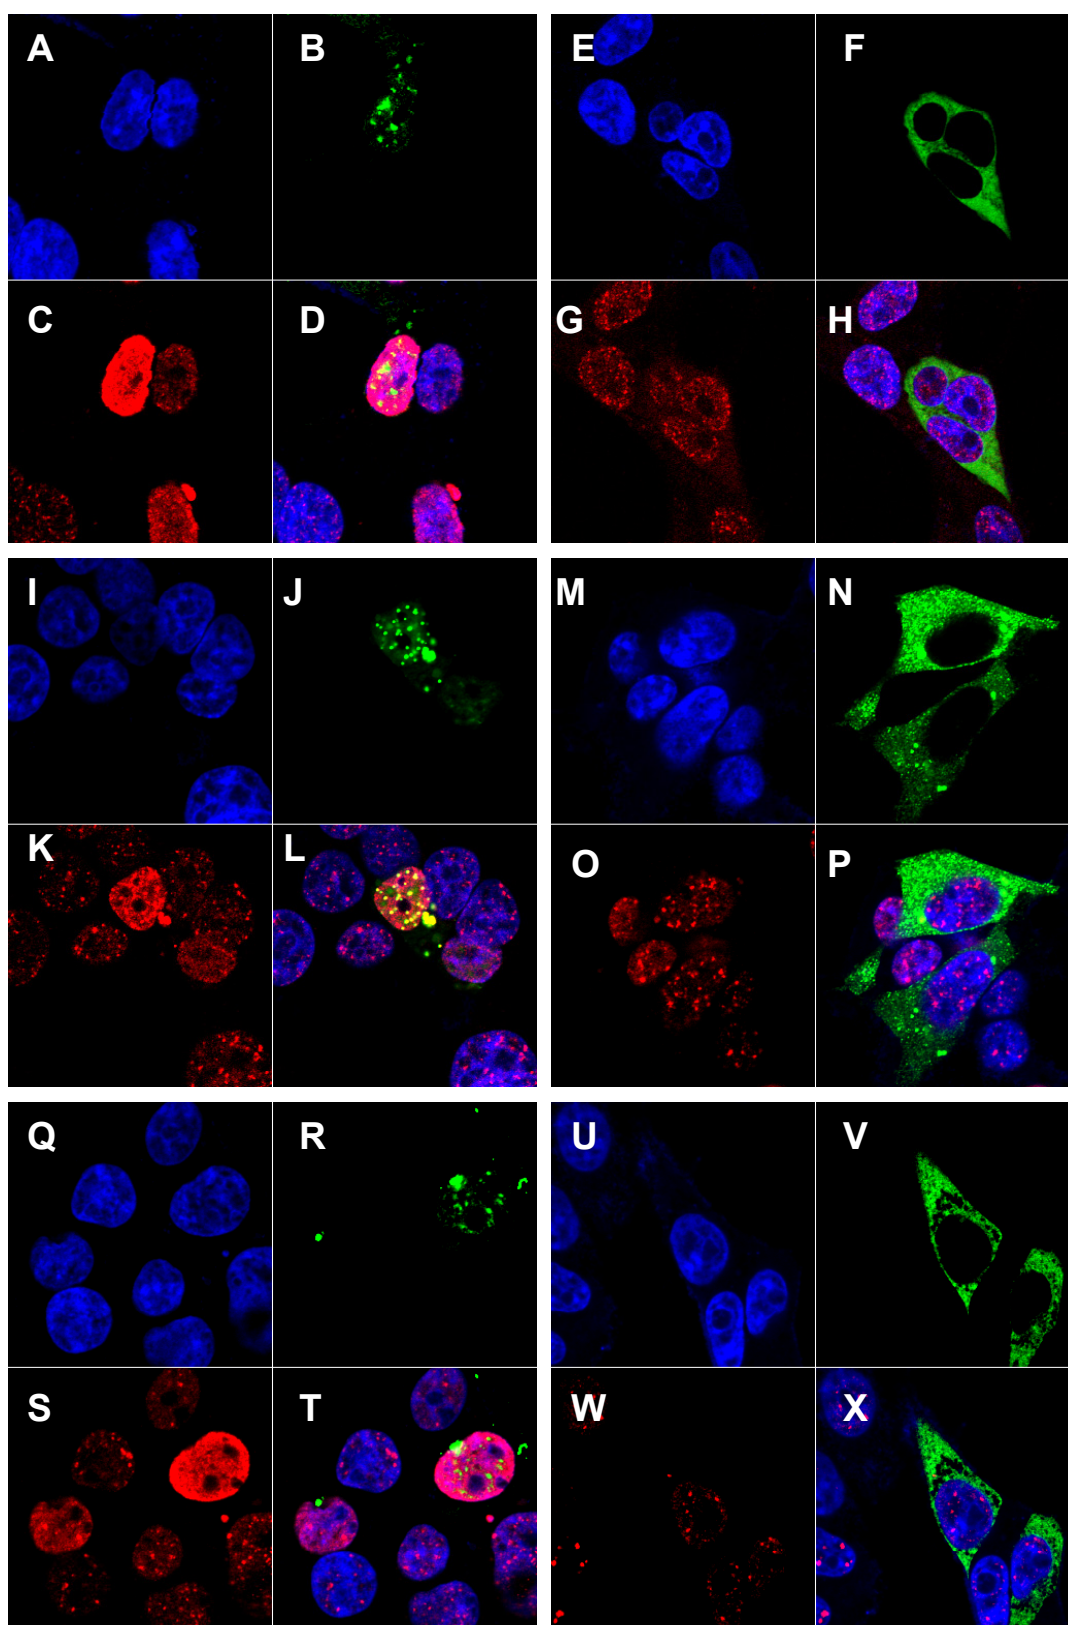

Supplement: M804931200_1.pdf [file M804931200_1.pdf]
